# Beyond resting state neuronal avalanches in the somatosensory barrel cortex

B. Mariani<sup>1,2</sup>, G. Nicoletti<sup>1</sup>, M. Bisio<sup>2,3</sup>, M. Maschietto<sup>3</sup>, R. Oboe<sup>4</sup>, S. Suweis<sup>1,2,\*</sup> and S. Vassanelli<sup>2,3,\*</sup>

<sup>1</sup>Laboratory of Interdisciplinary Physics, Physics and Astronomy Department, University of Padova, Padova, Italy.

<sup>2</sup> Padova Neuroscience Center, University of Padova, Padova, Italy

<sup>3</sup> Department of Biomedical Science, University of Padova, Padova, Italy

<sup>4</sup> Department of Management and Engineering, University of Padova, Padova, Italy

Correspondence\*:

stefano.vassanelli@unipd.it; samir.suweis@unipd.it

## 1 ABSTRACT

2 Since its first experimental signatures, the so called ‘critical brain hypothesis’ has been  
3 extensively studied. Yet, its actual foundations remain elusive. According to a widely accepted  
4 teleological reasoning, the brain would be poised to a critical state to optimize the mapping of the  
5 noisy and ever changing real-world inputs, thus suggesting that primary sensory cortical areas  
6 should be critical. We investigated whether a single barrel column of the somatosensory cortex  
7 of the anesthetized rat displays a critical behavior. Neuronal avalanches were recorded across  
8 all cortical layers in terms of both spikes and population local field potentials, and their behavior  
9 during spontaneous activity compared to the one evoked by a controlled single whisker deflection.  
10 By applying a maximum likelihood statistical method based on timeseries undersampling to  
11 fit the avalanches distributions, we show that neuronal avalanches are power law distributed  
12 for both spikes and local field potentials during spontaneous activity, with exponents that are  
13 spread along a scaling line. Instead, after the tactile stimulus, activity switches to an across-layers  
14 synchronization mode that appears to dominate during cortical representation of the single  
15 sensory input.

16 **Keywords:** brain; criticality; avalanches; LFP; spikes; evoked; somatotomy; sensory; coding

## 1 INTRODUCTION

17 The human cortex operates in a state of restless activity, whose meaning and functionality are not yet  
18 understood. The critical brain hypothesis suggests that this is the result of the brain operating in the vicinity  
19 of the critical point of a phase transition, leading to a rich and variable dynamics at rest. In general, it  
20 has been argued that criticality provides biological systems with an optimal balance between robustness  
21 against perturbations and the flexibility to adapt to changing conditions. In the case of the brain, this would  
22 confer optimal computational capabilities (e.g., by optimizing the correlation length and the dynamic range,  
23 leading to the existence of large dynamical repertoires accompanied by maximal transmission and storage  
24 of information [1, 2, 3, 4, 5]). In this context, Hidalgo et al. [2] have shown that complex adaptive systems  
25 that have to cope with a great variety of stimuli are much more efficient when operating in the vicinity of a  
26 critical point, and thus they benefit from dynamically tuning themselves to that point.

27 By analyzing LFPs of cortical neurons in culture, the seminal work of J. Beggs and D. Plentz [6] provided  
28 the first evidence of power law distributed neuronal avalanches, i.e. cascades of activity interspersed by

29 periods of quiescence typical of critical systems. In particular, the exponents of these power laws were  
30 remarkably close to the ones of a critical branching process, hence suggesting a scenario in which neuronal  
31 networks are characterized by a marginal propagation of the activity at the critical point between an  
32 active and an absorbing phase. Since then, such power laws have been observed repeatedly in different  
33 experimental settings [7, 8, 9, 10, 11, 12], thus strengthening the critical brain hypothesis. Despite that,  
34 ambiguities, inconsistencies and open questions remain.

35 A first problem concerns the experimental definition of avalanche. In order to estimate avalanches, one  
36 needs to define discrete events. While neuronal spikes are events by nature, the conversion of coarse-  
37 sampled brain signals such as LFPs into a discrete form (e.g. by simply applying a threshold) is ambiguous  
38 and difficult to interpret in terms of neural correlates. As the relation between events and actual underlying  
39 neural activity becomes more uncertain, the definition of neural avalanches becomes fuzzy [13, 14, 15].  
40 Moreover, an avalanche should describe a cascade where individual units are *causally* activated, but in  
41 experiments causal information is not easily accessible and one needs to resort to various approximation  
42 strategies [16]. For example, temporal proximity between events is traditionally considered as a proxy for  
43 causality and avalanches are estimated by choosing a discrete time bin  $\Delta t$  that, in turn, depends on the  
44 choice of the threshold.

45 An additional limiting factor is spatial sampling of experimental recordings. Studies using coarse-  
46 sampled activity like LFPs typically yielded power-law distributions both in vivo and in vitro, but several  
47 experiments relying on spikes in awake animals did not [17, 18, 19]. One possible cause is insufficient  
48 spatial sampling of recording in awake conditions. Avalanches are a population phenomenon, but spikes are  
49 sparsely recorded in these experiments and reflect a subpopulation of neurons, in fact missing a consistent  
50 fraction of the real activity [18]. On the other hand, LFPs are average and composite signals that indeed  
51 reflect neuronal populations although they are difficult to interpret in terms of single neurons [20, 21, 22],  
52 a problem worsened by the event-extraction process [23].

53 Also because of these shortcomings, the real nature of the network processes and of the associated  
54 phase transition that generate neuronal avalanches has remained elusive. A recent study [24] showed that  
55 a statistical meta-analysis of many experiments suggests that the avalanche exponents are not universal,  
56 but rather spread along a scaling line. Intriguingly, and in contrast to the classical view of avalanches  
57 seen as generated by a quiescent-to-active phase transition, this work suggests that the critical transition  
58 in the brain occurs at the edge of synchronization alternatively originating avalanches, oscillations and  
59 UP/DOWN states [25].

60 Up to now, most of the work on neuronal avalanches has focused on spontaneous activity, while much  
61 remains to be understood about their behavior after perturbations caused by incoming inputs. Investigating  
62 the response to sensory stimuli in primary cortical areas is a clear-cut strategy to address this point. First,  
63 these brain regions can be expected to benefit from operating around a critical point to encode the sensory  
64 stimuli themselves. Moreover, sensory inputs, which are under direct experimental control, propagate  
65 to cortical networks across a limited number of well characterized processing stages (contrary to, e.g.,  
66 associative or motor areas). Avalanches were studied in the turtle visual cortex ex-vivo while the retina was  
67 exposed to a movie acting as a continuous visual stimulus [26, 27]. Based on neural avalanches extracted  
68 from LFPs, results suggested that the cortical network self-adapts to a critical state after a short period from  
69 the stimulus. However, in these experiments, LFPs were sparsely measured and reflected populations of  
70 neurons scattered across the visual processing cascade and downstream to important processing structures  
71 including the retina. Work on the primary auditory cortex hinted, instead, at a critical behavior both in

72 resting and post-stimulus conditions [28]. Noteworthy, measurements were confined to either layers 2/3 or  
73 4 and limited by the slow dynamics of calcium imaging to obtain an indirect estimate of neural activity.

74 In this work we contribute to verify the critical brain hypothesis with a systematic study of neuronal  
75 avalanches in the rat barrel cortex (the region of the rat primary somatosensory cortex that encodes tactile  
76 sensory inputs from the whiskers). We run our measurements across cortical layers in single barrel columns  
77 of the rat anesthetized with tiletamine. This common preparation for electrophysiology [29] displays rich  
78 cortical spontaneous activity, including UP and DOWN states and oscillations that have been linked to  
79 avalanches and criticality [30, 25]. Given the current challenges to test the critical brain hypothesis and  
80 the different results that different kinds of recorded signal can generate [17, 18, 19], we explored activity  
81 across a wide frequency range, covering both spikes and LFPs (i.e., up to 3000 Hz). Moreover, analysis  
82 was performed both on spontaneous and evoked activity and neural avalanches analyzed through a protocol  
83 based on state-of-the-art maximum likelihood statistical method [31].

## 2 MATERIALS AND METHODS

### 84 2.1 Electrophysiological recordings and surgical procedures

85 **Extracellular spikes and LFPs recordings.** Spikes were recorded using a neural probe with a linear  
86 array of thirty two Iridium Oxide (IrOx) microelectrodes with 65  $\mu\text{m}$  pitch (E32+R-65-S1-L6 NT; Atlas  
87 Neuroengineering) (Figure 1). Raw signals were acquired by an Open Ephys Acquisition Board (OEPS  
88 Tech, Lisbon, Portugal) at 25 KHz sampling frequency and band-pass filtered (300 - 3000 Hz). LFPs were  
89 recorded at high density using a CMOS based neural probe with an array of 256 microelectrodes (7.4  $\mu\text{m}$   
90 in diameter size and organized in four vertical columns and sixty-four horizontal rows) [32] with 32  $\mu\text{m}$   
91 pitch along both the horizontal and vertical axis (Figure 1). Raw multiplexed signals were acquired through  
92 a NI PXIe-6358 (National Instruments) board (sampling frequency 1.25MS/s at 16bit) and demultiplexed  
93 using a home-made LabVIEW software. The resulting whole-array LFP signal was sampled at 976.56 Hz  
94 and band-pass filtered (2-300 Hz). Once inserted in the barrel column, both arrays were spanning across all  
95 the six cortical layers (from 0 to  $-1800 \mu\text{m}$ ).

96 **Surgical implantation and single whisker stimulation.** Wistar rats were maintained under standard  
97 environmental conditions in the animal research facility of the Department of Biomedical Sciences -  
98 University of Padova. All the procedures were approved by the local Animal Care Committee (O.P.B.A.)  
99 and the Italian Ministry of Health (authorization number 522/2018-PR). Rats of both genders, aged 36  
100 to 50 days (P36 - P50) and weighting between 150 and 230 g, were anesthetized with an intra-peritoneal  
101 induction mixture of tiletamine-xylazine (2 mg and 1.4 g/100 g body weight, respectively), followed by  
102 additional doses (0.5 mg and 0.5 g/100 g body weight) every hour. The anesthesia level was constantly  
103 monitored by testing the absence of eye and hind-limb reflexes and whiskers' spontaneous movements.  
104 Before starting with surgery, the rat was fixed on a stereotaxic apparatus by teeth and ear bars. The body  
105 temperature was monitored continuously with a rectal probe and maintained at 37 °C by a heating pad. The  
106 skull was exposed through an anterior-posterior opening of the skin in the center of the head and a window  
107 was drilled over the right somatosensory barrel cortex at stereotaxic coordinates  $-1 \div -4 \text{ AP}$ ,  $+4 \div +8$   
108 ML referred to bregma [33]. A slit in the meninges was made with dedicated fine forceps at coordinates  
109  $-2.5 \text{ AP}$ ,  $+6 \text{ ML}$  for the subsequent insertion of the recording probe, and the brain was constantly bathed  
110 in Krebs' solution (in mM: NaCl 120, KCl 1.99, NaHCO<sub>3</sub> 25.56, KH<sub>2</sub>PO<sub>4</sub> 136.09, CaCl<sub>2</sub> 2, MgSO<sub>4</sub> 1.2,  
111 glucose 11).

112 The recording probe was fixed to a dedicated holder connected to a Patchstar micromanipulator  
113 (Scientifica Ltd, East Sussex, UK), which was used for inserting the probe into the cortex orthogonal to the

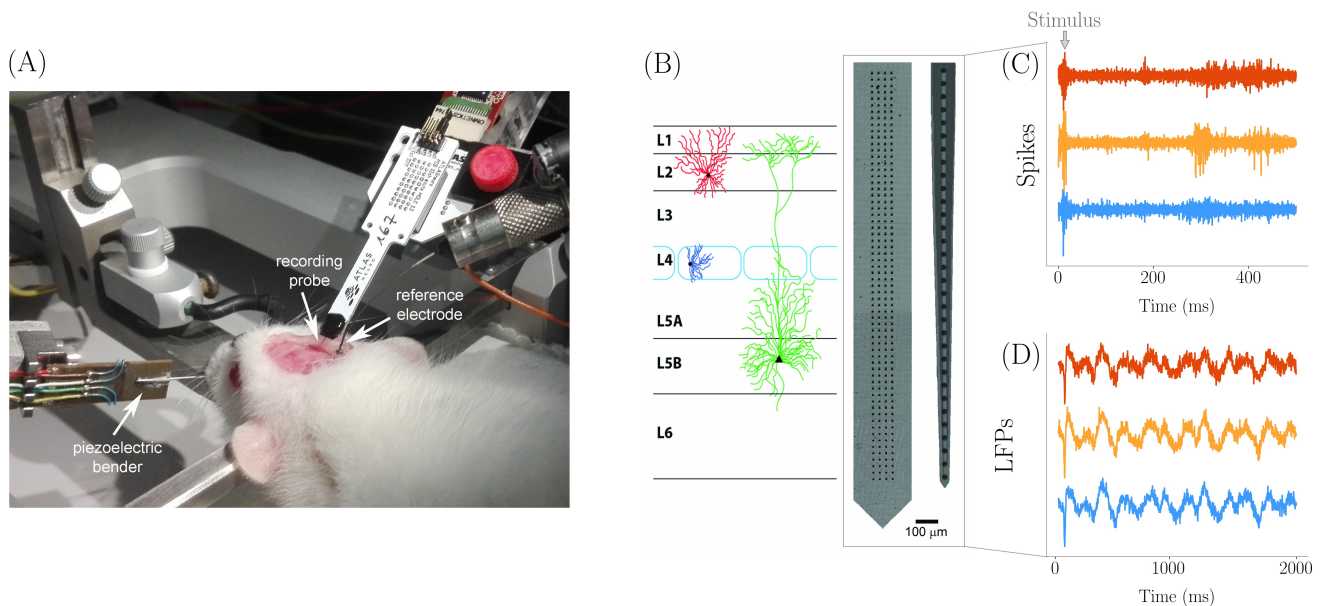

**Figure 1.** (A) Experimental setting for recording with the anesthetized rat immobilized on the stereotaxic apparatus. The Atlas probe for spikes recording is inserted in the barrel cortex through the dedicated cranial window. The cortical surface is bathed by Krebs' solution that is grounded through the immersed Ag/AgCl reference electrode. The piezoelectric bender with cannula used to control single whisker deflection is visible on the left. An identical arrangement, but with the custom high-density probe, was adopted for LFPs recording. (B) Custom 2D  $64 \times 4$  array used for LFPs and commercial 1D array used for spikes spanning across cortical layers as during recording. The actual number of electrodes inserted in the barrel cortex is 220 for LFPs (organized in a  $55 \times 4$  matrix form) and 27 for spikes. Examples of spikes (C) and LFPs (D) traces (from three representative channels each).

114 cortical surface. The depth was set at  $0 \mu\text{m}$  when the electrode proximal to the chip tip touched the cortical  
115 surface. An Ag/AgCl electrode bathed in Krebs' solution in proximity of the probe was used as reference.

116 Contralateral whiskers were trimmed at around 10 mm from the mystacial pad. To control deflection,  
117 single whiskers were inserted for 8 mm inside a cannula glued to a piezoelectric bender with integrated  
118 strain gauges (P-871.122; Physik Instrumente (PI) GmbH & Co. KG) and driven by a home-made closed-  
119 loop control system. Each stimulus, delivered by a waveform generator (Agilent 33250A 80 MHz, Agilent  
120 Technologies Inc., Colorado, USA), was consisting of a voltage pulse of 5 ms duration and  $100 \mu\text{s}$  rise/fall  
121 time applied to the piezoelectric bender. The principal (maximally responding) whisker identified on the  
122 basis of the amplitude of evoked LFP responses was selected for the recording session.

## 123 2.2 Avalanches analysis

124 Spikes and high-density LFPs recordings were performed separately in four and five rats, respectively.  
125 The minimum time interval between consecutive whisker stimuli was set to two seconds to avoid receptors  
126 and central adaptation phenomena. Accordingly, two seconds of recording after the stimuli were excluded  
127 from the analysis of *basal* activity. Due to the different duration of the stimulus-evoked avalanches in  
128 the LFPs and spikes domains (Fig. 2), *post-stimulus* intervals were set for analysis at 2 s or 500 ms for  
129 LFPs and spikes, respectively. In total, 2 minutes long recordings of LFPs basal activity and 5 minutes  
130 long recordings of spikes basal activity were analyzed for each rat. Forty stimulations of the whisker were  
131 considered for each rat in the analysis of LFPs evoked activity, while in spikes data the recordings of each  
132 rat included at least 60 stimulations of the whisker.



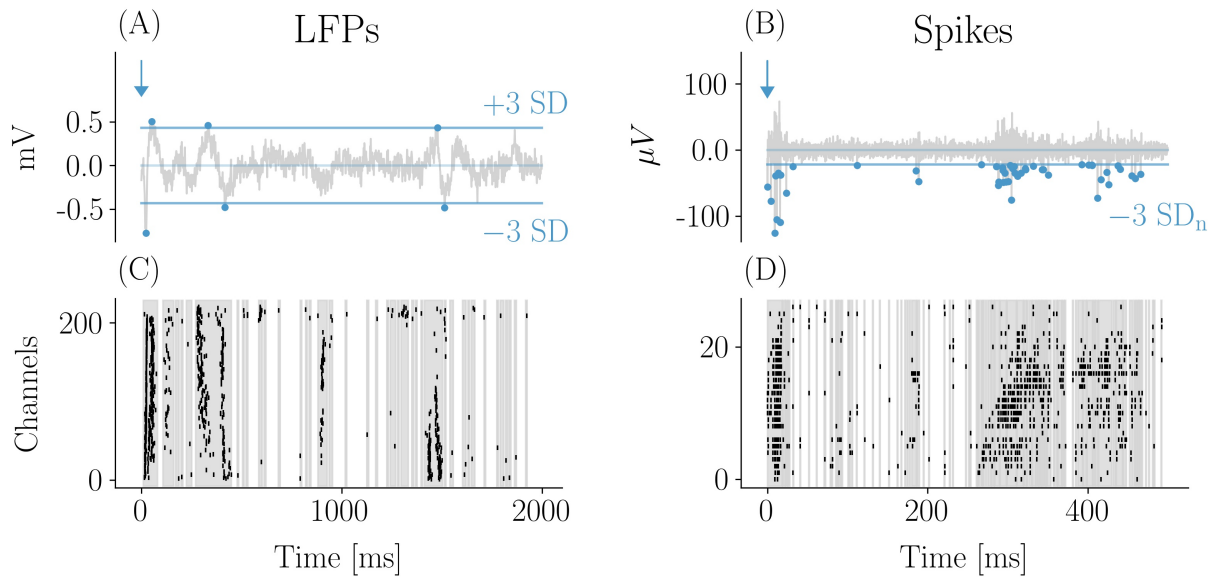

**Figure 2.** Evoked response by whisker stimulation: LFPs and spikes. Example of LFP (A) and spike (B) traces with the 3 standard deviations (SD) thresholds used for events detection (indicated by dots). The corresponding raster plots are shown in (C) and (D). The 2D array in (C) was rearranged in one dimension (groups of four sensors in a row are reported consecutively along the vertical axis). The early response to the stimulus occurred within few tens of milliseconds and was characterized by a high degree of events synchronization across channels both for LFPs and spikes. The typical LFP evoked response consisted in a first negative peak followed by a slower positive wave. Both were detected as events which is reflected in the raster plot. After the early response large and frequent avalanches typically followed, taking the form of oscillations of synchronous events across channels fading after a few hundreds of milliseconds from the stimulus. Correspondingly, epochs of high frequency firing (bursts) were observed in the spikes domain (C and D).

133 For the detection of LFP events, the standard deviation (SD) and the mean of the signal was computed  
134 for each channel. Both negative and positive deflections of the potential trace were considered *events*  
135 above a threshold of three SD. Moreover, each deflection was considered terminated only after it crossed  
136 the mean of the signal.

137 Noteworthy, in order to distinguish real events from noise, the choice of three SD was based on the  
138 distribution of the signal amplitudes which significantly deviated from a Gaussian best fit above that  
139 threshold (see Supplementary Material). For both post stimulus and basal (resting state) activity, an average  
140 inter event interval ( $\langle$ IEI $\rangle$ ) was calculated and used for temporal binning to estimate avalanches. Avalanches  
141 were defined as sequences of  $\langle$ IEI $\rangle$  time bins presenting activity in the form of events, with the end of the  
142 avalanche identified by the first empty bin. The number of events in each avalanche accounted for its size,  
143 while the duration was the number of temporal bins comprising the avalanche.

144 For extracellular spikes detection we used as threshold three SD of the noise [34]. Events recorded at the  
145 same time frame by different microelectrodes were ascribed to the same neuron and thus counted as one  
146 event, although avalanches results were not significantly affected by this correction. Statistics of neuronal  
147 avalanches were studied in the four rats, in resting state recordings and in recordings with a stimulation  
148 session.

### 149 **2.3 Power law fitting and statistical testing**

150 The avalanches sizes and durations distributions are fitted using the maximum likelihood method. The  
151 fitting function for both avalanche sizes and duration is a discrete power-law:

$$p(y; \alpha) = \frac{y^{-\alpha}}{\sum_{x=x_{min}}^{x=x_{max}} x^{-\alpha}}. \quad (1)$$

152 The parameter  $x_{max}$  is set to the maximum observed size or duration. Then the tails of the distributions  
153 are fitted by selecting as parameter  $x_{min}$  the one that minimizes the Kolmogorov-Smirnov distance (KS),  
154 following the method proposed by Clauset et al. [35]:

$$KS = \max_{y \geq x_{min}} |S(y) - \hat{P}(y)| \quad (2)$$

155 where  $S(y)$  is the cumulative distribution function (CDF) of the data and  $\hat{P}(y)$  is the CDF of the theoretical  
156 distribution fitted with the parameter that best fits the data for  $y \geq x_{min}$ .

157 After finding the best-fit power law, to assess goodness-of-fit we compared the experimental data against  
158 1000 surrogate datasets drawn from the best-fit power law distribution with the same number of samples  
159 as the experimental dataset. The deviation between the surrogate datasets and a perfect power law was  
160 quantified with the KS statistic. The p-value of the power-law fit was defined as the fraction of these  
161 surrogate KS statistics which were greater than the KS statistic for the experimental data. Note that the  
162 data were considered power law distributed if the null hypothesis could not be rejected, namely if the the  
163 p-value turned out to be greater than the significance level, which was set to a conservative value of 0.1.

164 However, when estimating the parameters and evaluating the p-value, we take into consideration another  
165 aspect that has been recently pointed out in [31]. A point often ignored is that maximum likelihood methods  
166 rely on two assumptions:

- 167 1. the observations  $y$  are distributed as  $p(y; \alpha)$ , where  $\alpha$  is the power law exponent;
- 168 2. the empirical observations  $y_i, i = 1, \dots, N$ , are independent.

169 While the first assumption corresponds to our choice of a statistical law, statistical tests rely on the second  
170 one, which for instance is implicitly assumed when the log-likelihood is computed as  $\sum_{i=1}^{i=N} \log p(y_i)$ .  
171 However, complex systems are often characterized by strong temporal and spatial inter-dependencies,  
172 thus often violating the independence assumption. This may lead to false rejections of the statistical laws  
173 and to over-optimistic uncertainties of the estimated parameters. The authors of [31] propose a method to  
174 distinguish between these assumptions, and we exploit it here to estimate the parameters and evaluate the  
175 goodness-of-fit. Briefly, we take the timeseries of sizes or durations of consecutive avalanches, and we  
176 estimate the time  $\tau^*$  after which to observations (e.g. the avalanche sizes) are independent from each other.  
177 In practice,  $\tau^*$  is obtained by computing the time at which the autocorrelation of the timeseries reaches an  
178 interval around zero (1-percentile of the random realization). Then, the original sequence of length  $N$  is  
179 randomized,  $N^* = N/\tau^*$  observations are selected and the standard statistical analysis is applied to the  
180 new sample. This guarantees that the new sample of dimension  $N^* < N$  comprises only uncorrelated  
181 avalanches.

182 Indeed, in our timeseries of sizes and durations we find non negligible values of  $\tau^*$  (see Supplementary  
183 Material), and we verify that the acceptance rate of the statistical law increases for uncorrelated avalanches.

184 Because of the variability of the different realizations of the subsampling procedure, the exponents and the  
185 p-values shown in Tables 1 and 2 are obtained averaging over 20 repetitions of this subsampling.

### 3 RESULTS

#### 186 3.1 Preliminary considerations

The standard approach to infer criticality is to search for neuronal avalanches whose sizes and durations follow scale-free distributions in resting state (i.e., unperturbed) conditions. Indeed, at criticality, it is expected that such distributions scale as the power laws

$$P(S) \sim S^{-\tau}, \quad (3)$$

$$P(T) \sim T^{-\tau_t}, \quad (4)$$

187 where  $S$  is the number of events in an avalanche (i.e., the size),  $T$  is its duration (also called avalanche  
188 lifetime) and  $\tau$  and  $\tau_t$  are the related critical exponents. Power laws, however, can also stem from non  
189 critical systems and generative mechanisms. Thus, a more robust test of criticality is to verify whether the  
190 so-called crackling noise relation holds. This scaling relation was first developed in the context of crackling  
191 noise [36], hence the name, but nonetheless it is expected to hold in general in all systems close to their  
192 critical point [37], and in particular in systems with absorbing states [38]. The relation predicts that the  
193 critical exponent  $\delta$ , which relates the duration of an avalanche to its mean size as

$$\langle S \rangle(T) \sim T^{\delta_{\text{fit}}} \quad (5)$$

194 obeys the scaling relation

$$\delta_{\text{pred}} = \frac{\tau_t - 1}{\tau - 1}. \quad (6)$$

195 We estimated  $\delta$  in two independent ways, as  $\delta_{\text{pred}}$  and as  $\delta_{\text{fit}}$ , i.e., the slope of the least square fit of the  
196 average sizes given their durations. In principle, if these two estimates are compatible, then the system is  
197 compatible with criticality. Proving such relation is however challenging. First, it is sensitive to the fitting  
198 methods of the distributions of avalanche sizes and lifetimes, as it has been recently shown [39]. Second,  
199 in the case of LFPs, the range of avalanche lifetimes typically extends over one order of magnitude only,  
200 which undermines reliability of power law fitting.

201 A complementary approach is to look for criticality by perturbing the system, that is by shifting activity  
202 to a subcritical or supercritical regime and then measure the distance from a critical state [5, 40]. Thus,  
203 when measuring neural activity across a cortical barrel column of the rat brain, we also provided sensory  
204 stimuli consisting of impulsive deflections of the corresponding whisker and therefore representing strong,  
205 well defined, and accurately reproducible perturbations.

206 Neural avalanches sizes and durations were fitted with a discrete power law through the maximum  
207 likelihood method (see Section 2.3). As mentioned in the Materials and Methods section, we found non  
208 negligible values of the correlation time  $\tau^*$  both for spikes and LFPs, suggesting that events were not  
209 independent. Therefore, to test if avalanches were power law distributed, we corrected for dependencies  
210 between avalanches by subsampling the data of sizes and durations as described in Section 2.3.

#### 211 3.2 Avalanches in LFP Data

212 We first analyzed avalanches in LFP recordings and found similar results across five animals (Table  
213 1). First of all, we focused on spontaneous (i.e., resting, non stimulated) activity. We estimated  $\tau^*$

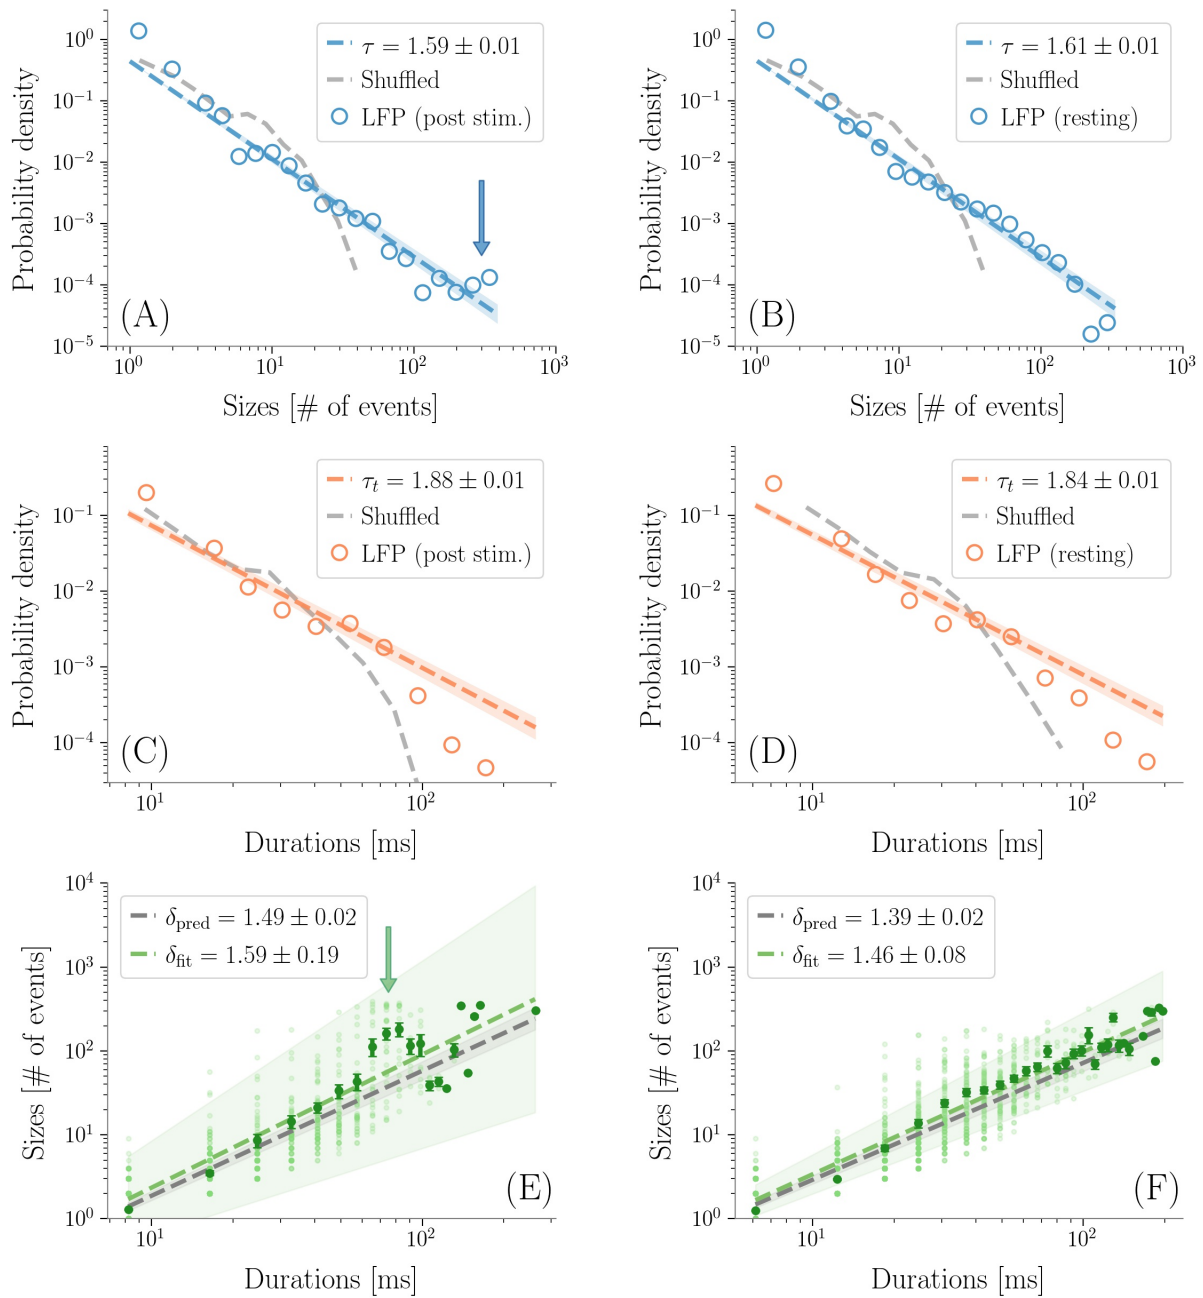

**Figure 3. LFP avalanches.** Representative probability densities of avalanches sizes in one rat after the sensory stimulus (A), or in resting state conditions (B). A bump deviating from the power law can be recognized in the post-stimulus distribution in correspondence of large avalanche sizes, pointed to by an arrow. Distributions of the avalanches' durations do not display clear alterations instead (C-D). Durations are expressed in *ms* by multiplying the number of bins by  $\langle \text{IEI} \rangle$ . In the randomized dataset the exponential distribution provides a better fit in all cases (dashed gray lines). The shuffling procedure consists in randomizing the occurrence times of the events of each channel, so that the events rate of each channel is preserved. (E-F) The crackling noise relation is verified in both cases within the experimental errors (i.e.,  $\delta_{\text{pred}}$  is compatible with  $\delta_{\text{fit}}$ ). Once more, notice in (E) the presence of a bump (indicated by an arrow) in the post-stimulus regime.

214 and subsampled the sizes and the lifetimes accordingly to ensure that individual observations were  
 215 uncorrelated (thus not violating the assumption of the maximum likelihood method). Following this



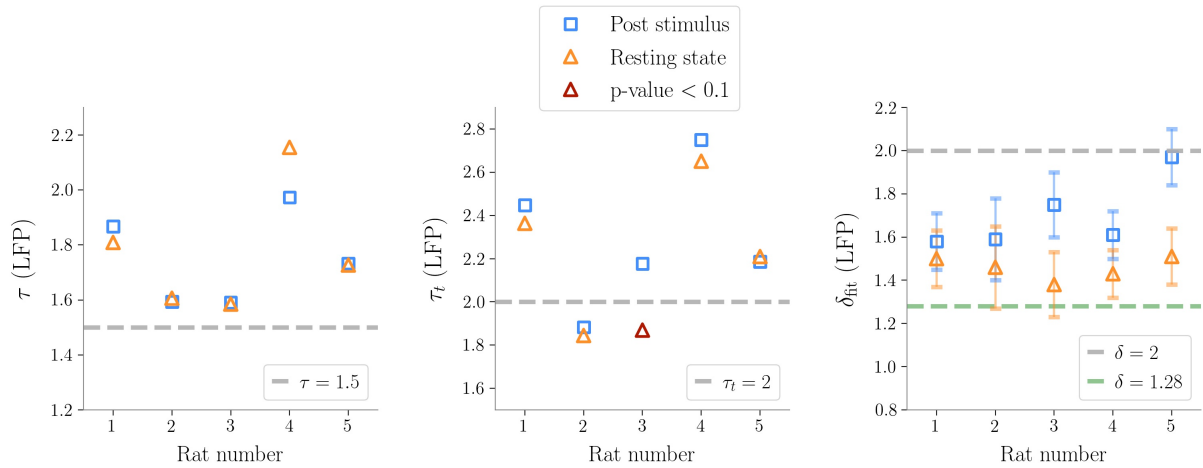

**Figure 4.** Exponents obtained after subsampling in Local Field Potential data ( $\tau$  is the exponent for the sizes,  $\tau_t$  for the durations,  $\delta_{\text{fit}}$  is the fitted exponent from  $\langle S(T) \rangle \sim T^{\delta_{\text{fit}}}$ ). The exponents predicted by the critical branching process are shown in the plot as gray dashed lines. The line  $\delta = 1.28$  is also plotted, which is reported in [24] as a universal exponent found in many different experiments. It is noteworthy that, as seen in the plot on the right, the exponents  $\delta_{\text{fit}}$  are always far from the hallmark of the branching process, except for one case after stimulation, where the presence of large bumps in the size distribution makes the slope of the line in the  $(\langle S(T) \rangle, T)$  plane steeper.

|       |               | $\tau$ | p-values | $\tau$ (sub.) | p-values (sub.) | $\tau_t$ | p-values | $\tau_t$ (sub.) | p-values (sub.) |
|-------|---------------|--------|----------|---------------|-----------------|----------|----------|-----------------|-----------------|
| Rat 1 | Post stim.    | 1.85   | 0.04     | 1.87          | 0.48            | 2.44     | 0.16     | 2.45            | 0.50            |
|       | Resting state | 1.82   | < 0.001  | 1.80          | 0.33            | 2.38     | 0.40     | 2.36            | 0.63            |
| Rat 2 | Post stim.    | 1.59   | 0.1      | 1.59          | 0.50            | 1.87     | 0.004    | 1.88            | 0.14            |
|       | Resting state | 1.60   | 0.02     | 1.60          | 0.38            | 1.84     | < 0.001  | 1.84            | 0.24            |
| Rat 3 | Post stim.    | 1.60   | 0.13     | 1.60          | 0.41            | 2.19     | 0.05     | 2.18            | 0.36            |
|       | Resting state | 1.57   | 0.07     | 1.58          | 0.60            | 1.87     | < 0.001  | 1.87            | 0.03            |
| Rat 4 | Post stim.    | 1.98   | 0.27     | 1.97          | 0.56            | 2.78     | 0.41     | 2.75            | 0.7             |
|       | Resting state | 2.16   | 0.54     | 2.15          | 0.72            | 2.67     | 0.30     | 2.65            | 0.58            |
| Rat 5 | Post stim.    | 1.74   | 0.30     | 1.73          | 0.71            | 2.19     | 0.07     | 2.19            | 0.45            |
|       | Resting state | 1.72   | 0.56     | 1.73          | 0.78            | 2.18     | 0.09     | 2.20            | 0.55            |

**Table 1.** Exponents before and after subsampling in LFP data, with the corresponding p-values. Note that the p-values obtained after subsampling are always greater than the significance level 0.1 both for  $\tau$  and  $\tau_t$ , except for the  $\tau_t$  p-value of rat 3.

216 correction, avalanches resulted power law distributed across the five rats, except for one case for the  
217 avalanches durations (see Figure 4 and Table 1).

218 Then, we analyzed stimulus-evoked responses over two seconds after the stimulus and confirmed power  
219 law scaling (accepted by statistical tests). However, at a more careful look, the size distribution was altered  
220 by the presence of a *bump* (also known as heap [25]), Figure 3. Clearly, the bump derived from an excess of  
221 large size avalanches (i.e., involving a large number of microelectrodes). As suggested by Figure 2, these  
222 avalanches were not only large, but also composed by highly synchronous events across cortical layers.  
223 Correspondingly, the bump vanished in the duration distribution, confirming that the increase in avalanche  
224 sizes was not accompanied by a corresponding increase of lifetimes and the events remained concentrated  
225 within a few time bins.

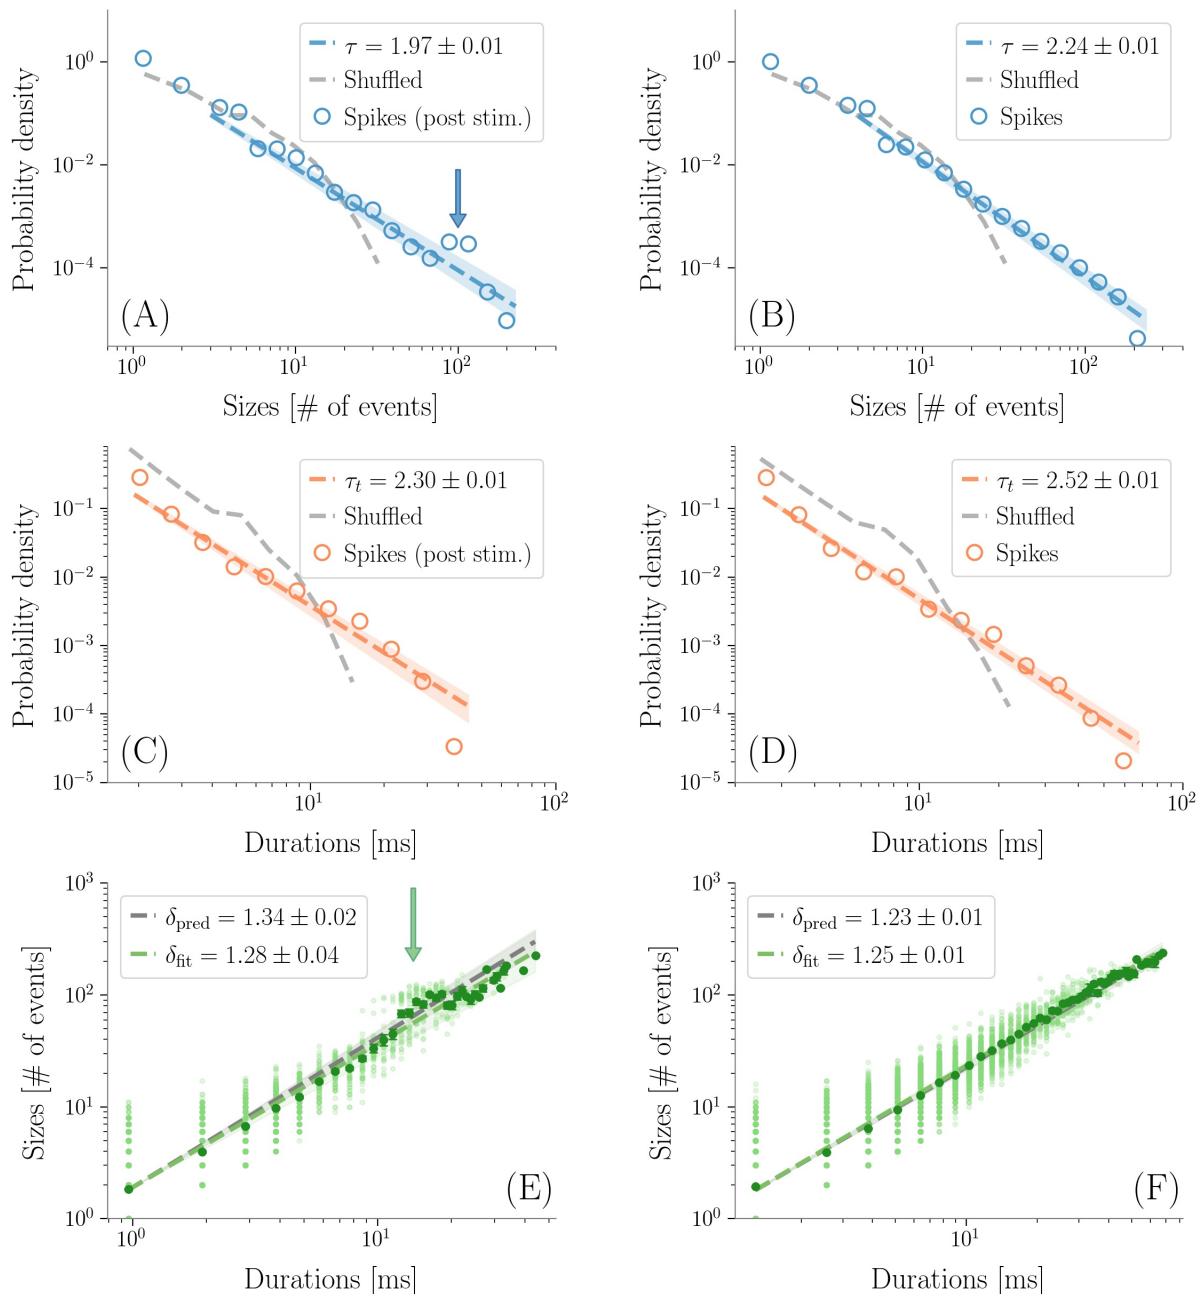

**Figure 5. Avalanches in spikes data.** Avalanches sizes probability density in one rat after a stimulus (A), and during resting state (B). Notice the bump in the post-stimulus distribution. (C-D) The same, for avalanche durations. Durations are expressed in *ms* by multiplying the number of bins times  $\langle \text{IEI} \rangle$ . In the randomized datasets the exponential distribution provides a better fit in all cases. The shuffling procedure consists in randomizing the occurrence times of the events of each channel, so that the events rate of each channel is preserved. (E-F) The crackling noise relation is verified in both cases within the experimental errors. Once more, notice in (E) the presence of a bump in the post-stimulus regime.

226 In general, we found that the crackling noise relation was verified both at resting state and post-stimulus  
 227 (Figure 3 and see Supplementary material for the avalanches results on all the rats). Nevertheless, after  
 228 the stimulus, a localized deviation from the expected trend was observed in correspondence of the bump  
 229 found in the size distribution and therefore also attributed to large and synchronized waves of activity  
 230 unleashed by whisker deflection. As anticipated previously, avalanches durations, and consequently also

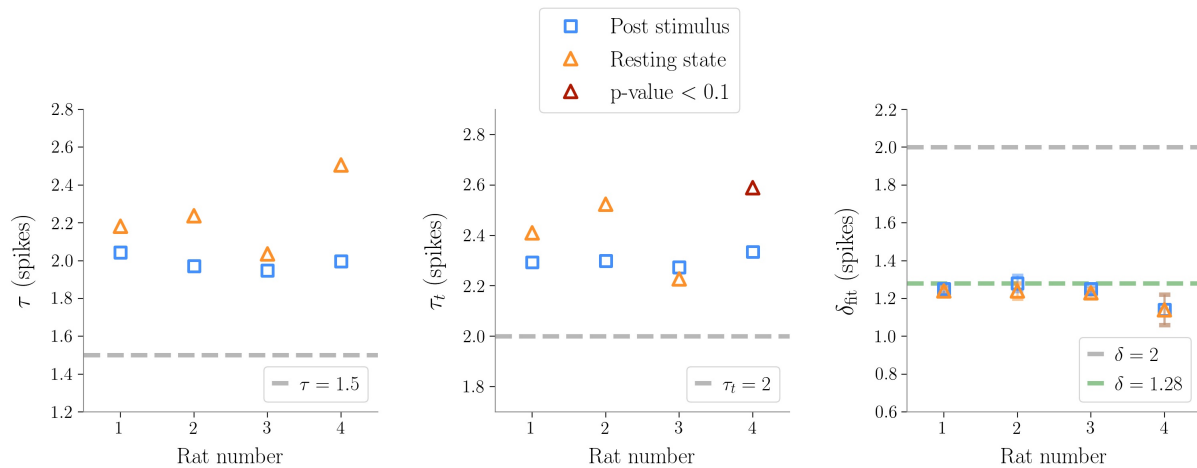

**Figure 6.** Exponents obtained after subsampling in spikes data ( $\tau$  exponent for the sizes,  $\tau_t$  for the durations,  $\delta_{\text{fit}}$  the fitted exponents of the crackling-noise relation). The exponents predicted by the critical branching process are also plotted. The line  $\delta_{\text{fit}} = 1.28$  is also plotted, which is found in [24], and which turns out to be remarkably close to our results.

|       |               | $\tau$ | p-values | $\tau$ (sub.) | p-values (sub.) | $\tau_t$ | p-values | $\tau_t$ (sub.) | p-values (sub.) |
|-------|---------------|--------|----------|---------------|-----------------|----------|----------|-----------------|-----------------|
| Rat 1 | Post stim.    | 1.98   | 0.077    | 1.97          | 0.63            | 2.27     | 0.27     | 2.30            | 0.79            |
|       | Resting state | 2.23   | 0.2      | 2.23          | 0.66            | 2.52     | 0.34     | 2.52            | 0.67            |
| Rat 2 | Post stim.    | 2.00   | 0.73     | 1.95          | 0.74            | 2.25     | 0.41     | 2.27            | 0.74            |
|       | Resting state | 2.04   | 0.003    | 2.03          | 0.43            | 2.23     | < 0.001  | 2.23            | 0.1             |
| Rat 3 | Post stim.    | 2.05   | 0.72     | 2.04          | 0.75            | 2.34     | 0.84     | 2.29            | 0.73            |
|       | Resting state | 2.18   | 0.004    | 2.18          | 0.42            | 2.41     | < 0.001  | 2.41            | 0.26            |
| Rat 4 | Post stim.    | 1.98   | 0.06     | 2.00          | 0.91            | 2.51     | 0.01     | 2.33            | 0.63            |
|       | Resting state | 2.50   | 0.12     | 2.50          | 0.19            | 2.67     | < 0.001  | 2.60            | < 0.001         |

**Table 2.** Exponents before and after subsampling in spikes data, with the corresponding p-values. Note that the p-values obtained after subsampling are always greater than the significance level 0.1 both for  $\tau$  and  $\tau_t$ , except for the  $\tau_t$  p-value of rat 4.

231  $\langle S \rangle(T)$ , extended over about two orders of magnitude. In fact, since LFPs are average signals that integrate  
 232 over space and time single neuron events, it is expected that the maximum size of the avalanches extracted  
 233 from LFPs is of the order of the array size (see Supplementary material for an analysis of finite size effects  
 234 in LFPs avalanches) [6]. Specifically, a cutoff in  $P(S)$  around a value  $N_C \approx N_E$ , with  $N_E$  the number  
 235 of the recording electrodes, is commonly observed experimentally, meaning that during an avalanche  
 236 each electrode is typically activated just once. This cutoff in  $P(S)$  implies that  $\langle S \rangle(T) < N_C$ , and, from  
 237  $\langle S \rangle(T) \sim T^\delta$ , it also implies  $T < N_C^{\frac{1}{\delta}}$  [20]. Thus, if  $\delta > 1$ , the cut-off in  $P(S)$  causes a much earlier  
 238 cut-off in both  $P(T)$  and  $\langle S \rangle(T)$ .

### 239 3.3 Avalanches in Spikes Data

240 Spikes avalanches were analyzed for four rats. Albeit grossly similar to LFPs, results unveiled important  
 241 differences, first of all the fact that they were almost not affected by the finite size of the recording array.  
 242 In fact, despite the low number of microelectrodes (twenty-seven sites spanning across the cortex in the  
 243 vertical direction), avalanches could be observed with size greater than  $10^2$  events. The reason is that, in  
 244 spikes, the same avalanche can reach an electrode repeatedly and in quick succession, contrary to LFPs

245 where single neuron contributions are integrated over space and time within the brain tissue and coalesce  
246 to generate the recorded signal [20].

247 Similarly to LFPs, we found a power law distribution of avalanches both in terms of size and duration,  
248 except for one rat deviating from this general trend with respect to duration alone (Table 2 and Figure 6).  
249 Moreover, we confirmed the emergence of the bump of activity in the post-stimulus size distribution caused  
250 by the abundant number of large-sized avalanches (Figure 5).

251 The exponents  $\tau$  and  $\tau_t$  were greater than the ones found in LFPs (Table 2), but also greater than the ones  
252 predicted for a critical branching process (Figure 6). Interestingly, the exponent  $\delta$  was consistently close  
253 to the value  $\delta \approx 1.28$  which was found in [24] to be universal, i.e. to hold across different experimental  
254 conditions, from cultured slices to freely moving or anesthetized mammals.

255 Finally, as avalanche size and duration were less affected by finite size effects with respect to LFPs,  
256 spikes allowed us to reliably test the crackling noise relation, which was verified in all dataset (Figure 5,  
257 see also Supplementary materials). In particular, from the results on spikes data, that are believed to be  
258 more robust in this respect [37], we concluded that post-stimulus avalanches statistics is also compatible  
259 with the results recently reported by Fontenele and collaborators [24]. Nevertheless, also in this case, the  
260 waves of large and synchronized activity triggered by whisker deflection generated a local bump deviating  
261 from the crackling noise relation.

#### 4 DISCUSSION AND CONCLUSIONS

262 In this work we investigated criticality in the rat barrel cortex, which offers several advantages over other  
263 sensory systems. First, there is a clear and well characterized somatotopic representation of the whiskers in  
264 this primary sensory cortex, where single whiskers are basically mapped to single cortical columns with a  
265 one-to-one correspondence. This differentiates the barrel cortex from, e.g., the primary visual cortex where  
266 the spatial mapping of the inputs does not follow a simple vertical columnar organization.

267 Second, whisker receptors, which are transducers placed around the follicle, directly activate primary  
268 sensory neurons, that therefore encode whisker deflections without interposed processing. In other  
269 circumstances, such as in the visual system, the transduced stimulus is subject to extensive processing  
270 already at the periphery (e.g., by the retina network) which makes it difficult to disentangle the dynamics  
271 and the contributions of cortical and pre-cortical networks in response to sensory inputs. Moreover, the  
272 processing pipeline of the whisker somatosensory system is relatively simple and well characterized in  
273 mammals, with the trigeminal brainstem nuclei and the thalamus being the only two intermediate stages  
274 before the cortex [41, 42]. Third, single-whisker deflection can be controlled with high accuracy through  
275 closed-loop piezoelectric systems enabling a tight experimental control over delivered repetitions of sensory  
276 stimuli.

277 As for other sensory cortical areas, it can be hypothesized that the barrel cortex takes advantage of  
278 criticality to efficiently map tactile stimuli. This holds also for the single barrel column that faces the severe  
279 challenge to represent the parameters related to deflection of its corresponding whisker (e.g., amplitude,  
280 direction and velocity of displacement) as transduced by the follicle receptors, in an efficient, noise-tolerant  
281 manner and in real-time. According to a simplified general model of the processing in the barrel column, it  
282 is believed that layer IV acts as main input stage of sensory information propagating from the thalamus,  
283 whereas layer V is the main output. However, the few thousands neurons composing a single barrel form  
284 complex microcircuits of excitatory and inhibitory connections across layers. These microcircuits generate  
285 a rich dynamics that has been shown, both in-vitro and in-vivo, to include avalanches or synchronization



286 states, such as UP and DOWN states and oscillations, and whose significance in terms of tactile information  
287 mapping and processing is far from being understood [43, 44].

288 We run our investigation in an anesthetized condition (tiletamine) which, contrary to the awake animal,  
289 allowed us to precisely control whisker deflection by a piezoelectric actuator. With this anesthetic,  
290 spontaneous activity remains rich and contains periods of oscillations and UP and DOWN states, while the  
291 activity evoked by whisker stimulation shows clear similarities with the response of the awake animal. In  
292 the context of our study, another advantage of the anesthetized animal with respect to awake conditions was  
293 that, by reducing cortico-cortical communication, the anesthetic was insulating the somatosensory barrel  
294 region from external ‘contaminating’ the waves of activity propagating from other brain areas [29, 45, 46].

295 We measured neural activity across the six cortical layers of a single barrel both in the domain of spikes  
296 and LFPs, thus extending the avalanches analysis over a wide frequency range and covering both single  
297 neuron and population dynamics. For LFPs, we used a high-density 2D array of microelectrodes developed  
298 at the purpose to monitor at high spatial resolution the electrical potential within a planar section of the  
299 barrel column [47]. Contrary to previous work based on imaging methods [48], and in analogy to findings  
300 on spikes and LFPs [9, 18], we found signatures of criticality during spontaneous activity also in the  
301 anesthetized animal. Avalanche sizes and lifetimes followed power laws during basal activity, both in the  
302 case of spikes and of LFPs. Instead, after the stimulus power laws displayed localized bump-like alterations  
303 pointing at the emergence of high synchronization across layers.

304 Although we did observe inter-rats variability in the power-law exponents (Fig. 4 and 6), the exponent of  
305 the crackling noise relation consistently converged to  $\delta \approx 1.28$ , hinting at a critical behavior of the neural  
306 network activity across the cortical barrel column at rest [24] (Fig. 6). On the other hand, the spectrum of  
307 alternative hypotheses is broad. As recently pointed out [49, 20], this value may also emerge as a spurious  
308 result when subsampling spikes data in presence of an underlying process belonging to the branching  
309 process universality class. Moreover, different models with different phase transitions [15, 50, 25] may  
310 yield non-trivial exponents compatible with the ones found here. In general, the exponents we obtained are  
311 anomalous – in the sense that they differ for what reported in awake mammals such as, e.g., in monkey  
312 [7] – both for spikes and LFPs. A possible reason is the action of the anesthetic drug tiletamine, as similar  
313 deviations were reported previously [9].

314 At the same time, it is of the utmost importance to note that, with respect to the generative mechanism of  
315 the observed avalanches and exponents, it is not clear how a critical branching process could describe our  
316 experimental results. First, it assumes a clear separation of time scales between avalanches, and refers to  
317 slowly driven systems [51]; the barrel cortex, instead, receives continuous inputs from the thalamus, in  
318 addition to other cortical areas such as the secondary somatosensory cortex and the motor cortex. Second,  
319 it has still to be clarified how *mean field* exponents can arise in biologically realistic, non trivial networks  
320 [52, 53], and in the presence of feed-back loops such as the ones intrinsic to the barrel cortex. A number of  
321 feed-back connections within and among layers are present, and the connectivity is therefore remarkably  
322 different from the feed-forward one that was originally assumed to support the critical branching process  
323 [6]. We also note that generative mechanisms with absorbing states, such as the branching process, implies  
324 no correlation between avalanches [15]. However, in our data, we found non-negligible values of  $\tau^*$  hinting  
325 at the existence of temporal correlations between subsequent avalanches. Our results, on the other hand,  
326 are thus in agreement with previous works in which long range temporal correlations emerged through a  
327 detrended fluctuations analysis (DFA) of the signals [18, 54, 55]. Although the nature of such correlations  
328 remains unknown, we speculate that they may derive from a variety of neuronal and circuitual mechanisms

329 including, e.g., a neuromodulation of the barrel column, acting at time scales that are large compared to  
330 avalanches lifetimes.

331 Moreover, in the light of carefully investigating the underlying phase transition, avalanches  
332 characterization is sensitive to several parameters: exponents depend on the temporal bin chosen, and  
333 sampling effects may definitely bias the avalanches distribution. The first aspect is linked to the fact that,  
334 in absence of a clear separation of time-scales, it is not guaranteed that the avalanches found with the  
335 method of temporal binning reveal the underlying causal avalanches. For example, avalanches revealed by  
336 a time binning do not reproduce causal avalanches if they initiate simultaneously, or in the case of high  
337 stimulation rate [19, 56]. Recent works are indeed showing that both LFPs and spikes based avalanches  
338 may be problematic: in the former case, they may not be able to distinguish between a critical, a subcritical  
339 or supercritical phase [20, 23]; in the latter, it has been shown that the exponents of the distributions appear  
340 to be distorted [20, 49]. Recently, some first attempts were made to characterize criticality in neural systems  
341 in a broader sense [57, 58, 59], but as of now, and despite all these unsolved issues, power law avalanches  
342 are still the most employed approach to test the critical brain hypothesis.

343 Nonetheless, let us note that in our work we consistently find bumps in the avalanche sizes distributions  
344 in the periods after stimuli. These bumps mark avalanches with large sizes that appear with a higher  
345 probability than what would be predicted by the power law scaling - in the case of LFPs, these sizes  
346 are of the order of the array size. This interesting but seemingly simple observation has quite profound  
347 implications. In fact, the bumps are clearly related to large synchronization events that take place after  
348 stimuli, with avalanches characterized by highly synchronous activity across microelectrodes (see Fig. 2).  
349 These avalanches are related to the strong response to the stimulus that emerges prominently first in layer IV  
350 and then quickly spreads among the other layers, along a prevalent vertical direction, thus eliciting a global  
351 activity in the barrel. Therefore, the presence of the bumps is clearly related to the synchronization behavior  
352 of the barrel cortex and thus suggests that synchronization waves and oscillations play a fundamental role  
353 in shaping the neural activity during a time window dedicated to map the tactile stimulus in the brain. In  
354 recent years, some efforts in this direction were made [24, 25] but a comprehensive model of this kind of  
355 transition remains elusive.

356 In conclusion, on the one hand we believe that, in future works, it will be important to include other  
357 markers of criticality in the analysis that go beyond neuronal avalanches. For instance, we used the same  
358 LFP data to study the spatial correlations in the resting state and look for long-range correlations that are  
359 an hallmark of criticality [60], but one could also consider patterns of dynamic functional connectivity,  
360 e.g. obtained by computing the instantaneous phase difference between signals at different locations [61].  
361 These kind of analysis should be extended to include the behavior during and after the sensory input, going  
362 beyond the usual resting state studies. On the other hand we also believe that sound models of the possible  
363 self-organizing mechanisms of the cortex will have to necessarily take into account its oscillatory behavior,  
364 whose signature in the present work is the emergence of the bump in the avalanche size distribution due  
365 to the major synchronizations within the cortical network. In perspective, avalanches and oscillations  
366 may represent two faces of the cortical brain dynamics medal, two intertwined and functionally relevant  
367 processes that will have to be dealt with together in future theoretical and experimental investigations on  
368 the sensory coding in the brain.

## CONFLICT OF INTEREST STATEMENT

369 The authors declare that the research was conducted in the absence of any commercial or financial  
370 relationships that could be construed as a potential conflict of interest.

## **AUTHOR CONTRIBUTIONS**

371 SV and SS designed the study. SV, SS and MB supervised the research. MM conducted the experiments.  
372 RO designed the whisker control system. BM analyzed the data. BM and GN prepared the figures. BM,  
373 GN, MB, MM, SS and SV interpreted the results and wrote the article. All authors contributed to the article  
374 and approved the submitted version.

## **FUNDING**

375 S.S. acknowledges DFA and UNIPD for *SUWE\_BIRD2020\_01* grant, and INFN for LINCOLN grant.  
376 The work was supported by the grant SYNCH to SV (European Commission, FET Proactive, GA N.  
377 824162)

## **ACKNOWLEDGMENTS**

378 We thank A. Maritan for fruitful discussion.

## **DATA AVAILABILITY STATEMENT**

379 The dataset generated for this study is available upon request to [stefano.vassanelli@unipd.it](mailto:stefano.vassanelli@unipd.it)

## **REFERENCES**

- 380 [1]Miguel A. Muñoz. Colloquium: Criticality and dynamical scaling in living systems. *Rev. Mod. Phys.*,  
381 90:031001, 2018.
- 382 [2]Jorge Hidalgo, Jacopo Grilli, Samir Suweis, Miguel A Muñoz, Jayanth R Banavar, and Amos Maritan.  
383 Information-based fitness and the emergence of criticality in living systems. *Proceedings of the*  
384 *National Academy of Sciences*, 111(28):10095–10100, 2014.
- 385 [3]Woodrow L Shew and Dietmar Plenz. The functional benefits of criticality in the cortex. *The*  
386 *Neuroscientist*, 19,1:88–100, 2013.
- 387 [4]Osame Kinouchi and Mauro Copelli. Optimal dynamical range of excitable networks at criticality.  
388 *Nature physics*, 2(5):348–351, 2006.
- 389 [5]Woodrow L. Shew, Hongdian Yang, Thomas Petermann, Rajarshi Roy, and Dietmar Plenz. Neuronal  
390 avalanches imply maximum dynamic range in cortical networks at criticality. *Journal of Neuroscience*,  
391 29(49):15595–15600, 2009.
- 392 [6]John M. Beggs and Dietmar Plenz. Neuronal avalanches in neocortical circuits. *Journal of*  
393 *Neuroscience*, 12:23(35):11167–11177, 2003.
- 394 [7]Thomas Petermann, Tara C. Thiagarajan, Mikhail A. Lebedev, Miguel A. L. Nicolelis, Dante R.  
395 Chialvo, and Dietmar Plenz. Spontaneous cortical activity in awake monkeys composed of neuronal  
396 avalanches. *Proceedings of the National Academy of Sciences*, 106(37):15921–15926, 2009.
- 397 [8]Shan Yu, Hongdian Yang, Hiroyuki Nakahara, Gustavo S. Santos, Danko Nikolić, and Dietmar Plenz.  
398 Higher-order interactions characterized in cortical activity. *Journal of Neuroscience*, 31(48):17514–  
399 17526, 2011.
- 400 [9]G. Hahn, T Petermann, MN Havenith, and al. Neuronal avalanches in spontaneous activity in vivo. *J*  
401 *Neurophysiol.*, 104(6):3312–3322, 2010.
- 402 [10]E. D. Gireesh and D. Plenz. Neuronal avalanches organize as nested theta- and beta/gamma-oscillations  
403 during development of cortical layer 2/3. *Proc Natl Acad Sci U S A*, page 7576–7581, 2008.
- 404 [11]A. Mazzoni, F. D. Broccard, E. Garcia-Perez, P. Bonifazi, M.E. Ruaro, and V. Torre. On the dynamics  
405 of the spontaneous activity in neuronal networks. *PLoS One*, 2(5):e439, 2007.

- 406 [12]V Pasquale, P Massobrio, L.L. Bologna, M Chiappalone, and S. Martinoia. Self-organization and  
407 neuronal avalanches in networks of dissociated cortical neurons. *Neuroscience*, 153(4):1354-1369,  
408 2008.
- 409 [13]Jonathan Touboul and Alain Destexhe. Can power-law scaling and neuronal avalanches arise from  
410 stochastic dynamics? *PLOS ONE*, 5(2):1–14, 02 2010.
- 411 [14]Pablo Villegas, Serena di Santo, Raffaella Burioni, and Miguel A. Muñoz. Time-series thresholding  
412 and the definition of avalanche size. *Phys. Rev. E*, 100:012133, Jul 2019.
- 413 [15]Leonardo Dalla Porta and Mauro Copelli. Modeling neuronal avalanches and long-range temporal  
414 correlations at the emergence of collective oscillations: Continuously varying exponents mimic M/EEG  
415 results. *PLOS Computational Biology*, 15(4):1–26, 2019.
- 416 [16]Rashid V. Williams-García, John M. Beggs, and Gerardo Ortiz. Unveiling causal activity of complex  
417 networks. *Europhysics Letters*, 119:18003, 2017.
- 418 [17]N Deghani, N. G. Hatsopoulos, Z. G. Haga, R. . Parker, B. Greger, E. Halgren, S. S. Cash, and  
419 A. Destexhe. Avalanche analysis from multielectrode ensemble recordings in cat, monkey, and human  
420 cerebral cortex during wakefulness and sleep. *Frontiers in Physiology*, 3, 2012.
- 421 [18]Tiago L. Ribeiro, Mauro Copelli, Fábio Caixeta, Hindiael Belchior, Dante R. Chialvo, Miguel A. L.  
422 Nicolelis, and Sidarta Ribeiro. Spike avalanches exhibit universal dynamics across the sleep-wake  
423 cycle. *PLOS ONE*, 5(11):1–14, 2010.
- 424 [19]Viola Priesemann, Michael Wibral, Mario Valderrama, Robert Pröpper, Michel Le Van Quyen, Theo  
425 Geisel, Jochen Triesch, Danko Nikolić, and Matthias H. J. Munk. Spike avalanches in vivo suggest a  
426 driven, slightly subcritical brain state. *Frontiers in Systems Neuroscience*, 8:108, 2014.
- 427 [20]J. P. Neto, F. P. Spitzner, and V. Priesemann. A unified picture of neuronal avalanches arises from the  
428 understanding of sampling effects. *arXiv:1910.09984v2*, 2020.
- 429 [21]J. Wilting and V. Priesemann. 25 years of criticality in neuroscience — established results, open  
430 controversies, novel concepts. *Current Opinion in Neurobiology*, 58:105 – 111, 2019.
- 431 [22]G. Einevoll, C. Kayser, N. Logothetis, and S. Panzeri. Modelling and analysis of local field potentials  
432 for studying the function of cortical circuits. *Nat Rev Neurosci*, 14:770–785, 2013.
- 433 [23]Jonathan Touboul and Alain Destexhe. Power-law statistics and universal scaling in the absence of  
434 criticality. *Phys. Rev. E*, 95:012413, 2017.
- 435 [24]Antonio J. Fontenele, Nivaldo A. P. de Vasconcelos, Thaís Feliciano, Leandro A. A. Aguiar, Carina  
436 Soares-Cunha, Bárbara Coimbra, Leonardo Dalla Porta, Sidarta Ribeiro, Ana João Rodrigues, Nuno  
437 Sousa, Pedro V. Carelli, and Mauro Copelli. Criticality between cortical states. *Phys. Rev. Lett.*,  
438 122:208101, 2019.
- 439 [25]Serena di Santo, Pablo Villegas, Raffaella Burioni, and Miguel A. Muñoz. Landau–Ginzburg theory of  
440 cortex dynamics: Scale-free avalanches emerge at the edge of synchronization. *Proceedings of the  
441 National Academy of Sciences*, 115(7):E1356–E1365, 2018.
- 442 [26]W. Shew, W. Clawson, J. Pobst, and al. Adaptation to sensory input tunes visual cortex to criticality.  
443 *Nature Phys.*, 11:659–663, 2015.
- 444 [27]Wesley P. Clawson, Nathaniel C. Wright, Ralf Wessel, and Woodrow L. Shew. Adaptation towards  
445 scale-free dynamics improves cortical stimulus discrimination at the cost of reduced detection. *PLOS  
446 Computational Biology*, 13(5):1–21, 05 2017.
- 447 [28]Zac Bowen, Daniel E. Winkowski, Saurav Seshadri, Dietmar Plenz, and Patrick O. Kanold. Neuronal  
448 avalanches in input and associative layers of auditory cortex. *Frontiers in Systems Neuroscience*, 13:45,  
449 2019.



- 450 [29]Vincenzo Sorrenti, Claudia Cecchetto, Marta Maschietto, Stefano Fortinguerra, Alessandro Buriani,  
451 and Stefano Vassanelli. Understanding the effects of anesthesia on cortical electrophysiological  
452 recordings: A scoping review. *International Journal of Molecular Sciences*, 22(3), 2021.
- 453 [30]Silvia Scarpetta and Antonio de Candia. Alternation of up and down states at a dynamical phase-  
454 transition of a neural network with spatiotemporal attractors. *Frontiers in Systems Neuroscience*, 8:88,  
455 2014.
- 456 [31]Martin Gerlach and Eduardo G. Altmann. Testing statistical laws in complex systems. *Phys. Rev. Lett.*,  
457 122:168301, 2019.
- 458 [32]S. Schröder, C. Cecchetto, S. Keil, M. Mahmud, E. Brose, Ö. Dogan, G. Bertotti, D. Wolanski,  
459 B. Tillack, J. Schneidewind, H. Gargouri, M. Arens, J. Bruns, B. Szyszka, S. Vassanelli, and R. Thewes.  
460 Cmos-compatible purely capacitive interfaces for high-density in-vivo recording from neural tissue. In  
461 *2015 IEEE Biomedical Circuits and Systems Conference (BioCAS)*, pages 1–4, 2015.
- 462 [33]L.W. Swanson. *Brain maps: structure of the rat brain*. London, Academic press, third edition, 2003.
- 463 [34]R. Quian Quiroga, Z. Nadasdy, and Y. Ben-Shaul. Unsupervised Spike Detection and Sorting with  
464 Wavelets and Superparamagnetic Clustering. *Neural Computation*, 16(8):1661–1687, 08 2004.
- 465 [35]A. Clauset, C. R. Shalizi, and M. E. J. Newman. Power-law distributions in empirical data. *SIAM Rev.*,  
466 pages 661–703, 2009.
- 467 [36]J. Sethna, K. Dahmen., and C. Myers. Crackling noise. *Nature*, 410:242–250, 2001.
- 468 [37]Nir Friedman, Shinya Ito, Braden A. W. Brinkman, Masanori Shimono, R. E. Lee DeVille, Karin A.  
469 Dahmen, John M. Beggs, and Thomas C. Butler. Universal critical dynamics in high resolution  
470 neuronal avalanche data. *Phys. Rev. Lett.*, 108:208102, 2012.
- 471 [38]Serena di Santo, Pablo Villegas, Raffaella Burioni, and Miguel A. Muñoz. Simple unified view  
472 of branching process statistics: Random walks in balanced logarithmic potentials. *Phys. Rev. E*,  
473 95:032115, 2017.
- 474 [39]Alain Destexhe and Jonathan D. Touboul. Is there sufficient evidence for criticality in cortical systems?  
475 *eNeuro*, 8(2), 2021.
- 476 [40]Christian Meisel. Antiepileptic drugs induce subcritical dynamics in human cortical networks.  
477 *Proceedings of the National Academy of Sciences*, 117(20):11118–11125, 2020.
- 478 [41]Dirk Feldmeyer, Michael Brecht, Fritjof Helmchen, Carl C.H. Petersen, James F.A. Poulet, Jochen F.  
479 Staiger, Heiko J. Luhmann, and Cornelius Schwarz. Barrel cortex function. *Progress in Neurobiology*,  
480 103:3–27, 2013. Conversion of Sensory Signals into Perceptions, Memories and Decisions.
- 481 [42]Mathew E. Diamond, Moritz von Heimendahl, Per Magne Knutsen, David Kleinfeld, and Ehud Ahissar.  
482 'where' and 'what' in the whisker sensorimotor system. *Nature Reviews Neuroscience*, 9:601–612,  
483 2008.
- 484 [43]Dirk Feldmeyer. Excitatory neuronal connectivity in the barrel cortex. *Frontiers in Neuroanatomy*,  
485 6:24, 2012.
- 486 [44]C.C.H. Petersen. Sensorimotor processing in the rodent barrel cortex. *Nat. Rev. Neurosci.*, 20:533–546,  
487 2019.
- 488 [45]Rachel Aronoff, Ferenc Matyas, Celine Mateo, Carine Ciron, Bernard Schneider, and Carl C.H.  
489 Petersen. Long-range connectivity of mouse primary somatosensory barrel cortex. *European Journal*  
490 *of Neuroscience*, 31(12):2221–2233, 2010.
- 491 [46]Logan J. Voss, Paul S. García, Harald Hentschke, and Matthew I. Banks. Understanding the Effects  
492 of General Anesthetics on Cortical Network Activity Using Ex Vivo Preparations. *Anesthesiology*,  
493 130(6):1049–1063, 06 2019.

- 494 [47]Roland Thewes, Gabriel Bertotti, Norman Dodel, Stefan Keil, Sven Schröder, Karl-Heinz Boven,  
495 Günther Zeck, Mufti Mahmud, and Stefano Vassanelli. Neural tissue and brain interfacing cmos  
496 devices — an introduction to state-of-the-art, current and future challenges. In *2016 IEEE International*  
497 *Symposium on Circuits and Systems (ISCAS)*, pages 1826–1829, 2016.
- 498 [48]Gregory Scott, Erik D. Fagerholm, Hiroki Mutoh, Robert Leech, David J. Sharp, Woodrow L. Shew,  
499 and Thomas Knöpfel. Voltage imaging of waking mouse cortex reveals emergence of critical neuronal  
500 dynamics. *Journal of Neuroscience*, 34(50):16611–16620, 2014.
- 501 [49]Tawan T. A. Carvalho, Antonio J. Fontenele, Mauricio Girardi-Schappo, Thaís Feliciano, Leandro  
502 A. A. Aguiar, Thais P. L. Silva, Nivaldo A. P. de Vasconcelos, Pedro V. Carelli, and Mauro Copelli.  
503 Subsampled directed-percolation models explain scaling relations experimentally observed in the brain.  
504 *Frontiers in Neural Circuits*, 14:83, 2021.
- 505 [50]Simon-Shlomo Poil, Richard Hardstone, Huibert D. Mansvelder, and Klaus Linkenkaer-  
506 Hansen. Critical-state dynamics of avalanches and oscillations jointly emerge from balanced  
507 excitation/inhibition in neuronal networks. *Journal of Neuroscience*, 32(29):9817–9823, 2012.
- 508 [51]Daniel J. Korchinski, Javier G. Orlandi, and Seung-Woo Son Jörn Davidsen. Criticality in spreading  
509 processes without time-scale separation and the critical brain hypothesis. <https://arXiv:1908.08163v2>,  
510 2020.
- 511 [52]Filippo Radicchi, Claudio Castellano, Alessandro Flammini, Miguel A. Muñoz, and Daniele Notarmuzi.  
512 Classes of critical avalanche dynamics in complex networks. *Phys. Rev. Research*, 2:033171, 2020.
- 513 [53]Nam Jung, Quang Anh Le, Kyoung-Eun Lee, and Jae Woo Lee. Avalanche size distribution of  
514 an integrate-and-fire neural model on complex networks. *Chaos: An Interdisciplinary Journal of*  
515 *Nonlinear Science*, 30(6):063118, 2020.
- 516 [54]Klaus Linkenkaer-Hansen, Vadim V. Nikouline, J. Matias Palva, and Risto J. Ilmoniemi. Long-range  
517 temporal correlations and scaling behavior in human brain oscillations. *Journal of Neuroscience*,  
518 21(4):1370–1377, 2001.
- 519 [55]Richard Hardstone, Simon-Shlomo Poil, Giuseppina Schiavone, Rick Jansen, Vadim Nikulin, Huibert  
520 Mansvelder, and Klaus Linkenkaer-Hansen. Detrended fluctuation analysis: A scale-free view on  
521 neuronal oscillations. *Frontiers in Physiology*, 3:450, 2012.
- 522 [56]Leandro J. Fosque, Rashid V. Williams-García, John M. Beggs, and Gerardo Ortiz. Evidence for  
523 quasicritical brain dynamics. *Phys. Rev. Lett.*, 126:098101, Mar 2021.
- 524 [57]Vidit Agrawal, Srimoy Chakraborty, Thomas Knöpfel, and Woodrow L. Shew. Scale-change symmetry  
525 in the rules governing neural systems. *iScience*, 12:121–131, 2019.
- 526 [58]Leenoy Meshulam, Jeffrey L. Gauthier, Carlos D. Brody, David W. Tank, and William Bialek. Coarse  
527 graining, fixed points, and scaling in a large population of neurons. *Phys. Rev. Lett.*, 123:178103, Oct  
528 2019.
- 529 [59]Giorgio Nicoletti, Samir Suweis, and Amos Maritan. Scaling and criticality in a phenomenological  
530 renormalization group. *Phys. Rev. Research*, 2:023144, 2020.
- 531 [60]Benedetta Mariani, Giorgio Nicoletti, Marta Bisio, Marta Maschietto, Stefano Vassanelli, and Samir  
532 Suweis. On the critical signatures of neural activity, 2021.
- 533 [61]Joana Cabral, Diego Vidaurre, Paulo Marques, Ricardo Magalhães, Pedro Silva Moreira, José Miguel  
534 Soares, Gustavo Deco, Nuno Sousa, and Morten L. Kringelbach. Cognitive performance in healthy  
535 older adults relates to spontaneous switching between states of functional connectivity during rest.  
536 *Scientific Reports*, 7(1), 2017.

SUPPLEMENTARY MATERIAL

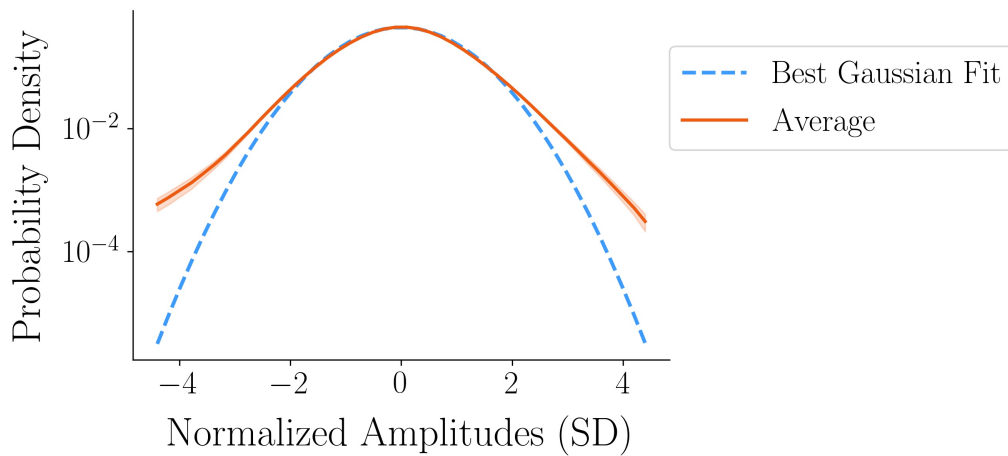

**Figure S1. LFPs events threshold definition.** The red curve depicts the grand average of the signals amplitude distributions over all channels and trials in LFPs of one rat. Note that the signal from each channel is z-normalized by subtracting its mean and dividing by the SD. The dashed line depicts the best fit of a Gaussian distribution to the data for the range between + 4.5 SD and - 4.5 SD. The Gaussian fit starts deviating from the average signal at around  $\pm 2$  SD. Hence, in order to avoid false positives, we set the event threshold at  $\pm 3$  SD. A logarithmic scale is used for the  $y$ -axis.

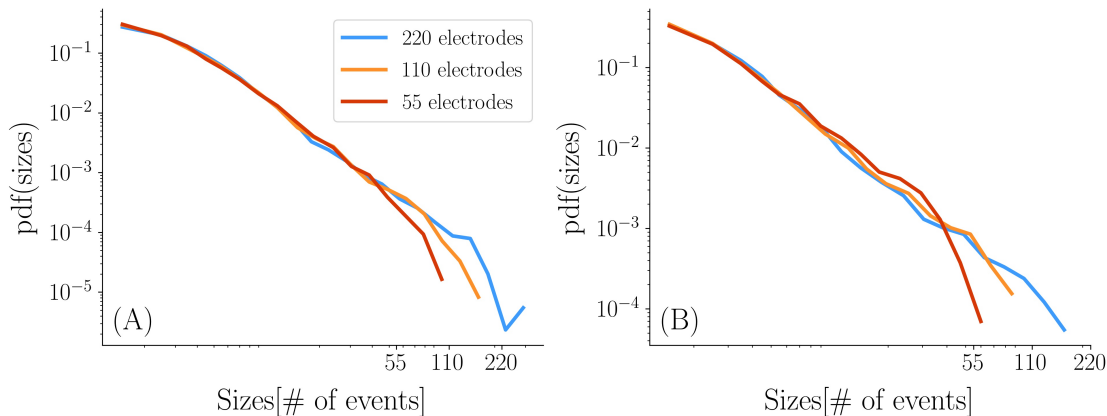

**Figure S2. Power law finite size effects analysis for LFP avalanche sizes at resting state.** We verify that the cutoff in LFP avalanches distribution is dependent on the size of the array. For this purpose, we repeat the avalanche analysis considering only halves and quarters of the array. For example, when considering quarters, only single columns of the array  $55 \times 4$  are considered in the analysis: the array is split along the direction of the barrel column, in order not to create halves/quartets with different behaviors due to the inclusion of different layers. The results from the four columns are averaged to produce the analysis for a quarter of the array. The same procedure is applied to the two halves of the array. We verify that the maximum size of the avalanches (called here  $N_C$ ) is dependent on the number of electrodes ( $N_E$ ) of the array. It results that  $N_C \geq N_E$  when considering both positive and negative excursions of the signals as events (Fig. S2 A), as in the main text [26], and it results that  $N_C \approx N_E$  when only negative excursions are considered as events (Fig. S2 B). As noted in the main text, this cutoff in the avalanche sizes induces a much earlier cutoff in avalanche durations. Also, the exponents do not change when reducing the number of electrodes.

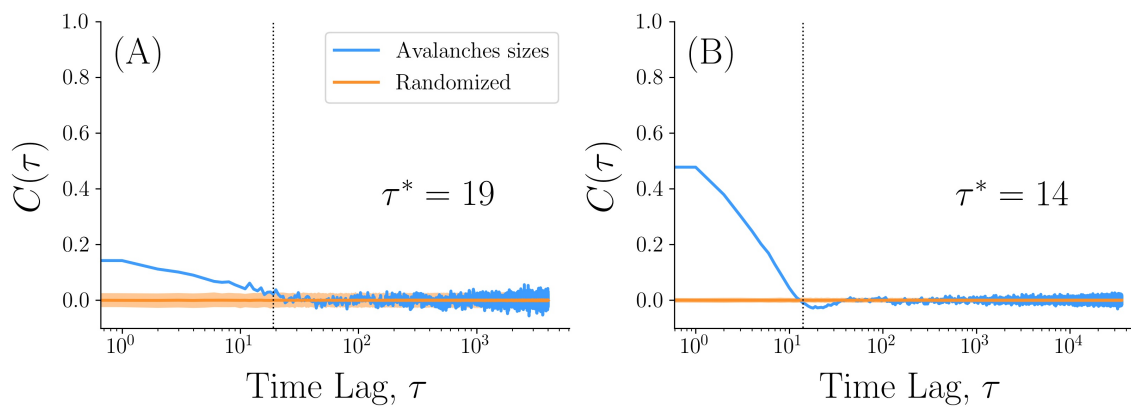

**Figure S3. Are avalanches correlated?** As these plots show, subsequent avalanches are correlated. The autocorrelation function of the logarithm of avalanche sizes during resting state is computed following [31]. (A) Avalanches in LFPs data display a characteristic autocorrelation time of  $\tau^* = 19$ , i.e. on average  $\tau^*$  consecutive avalanches are correlated. (B) In spikes data,  $\tau^* = 14$ .



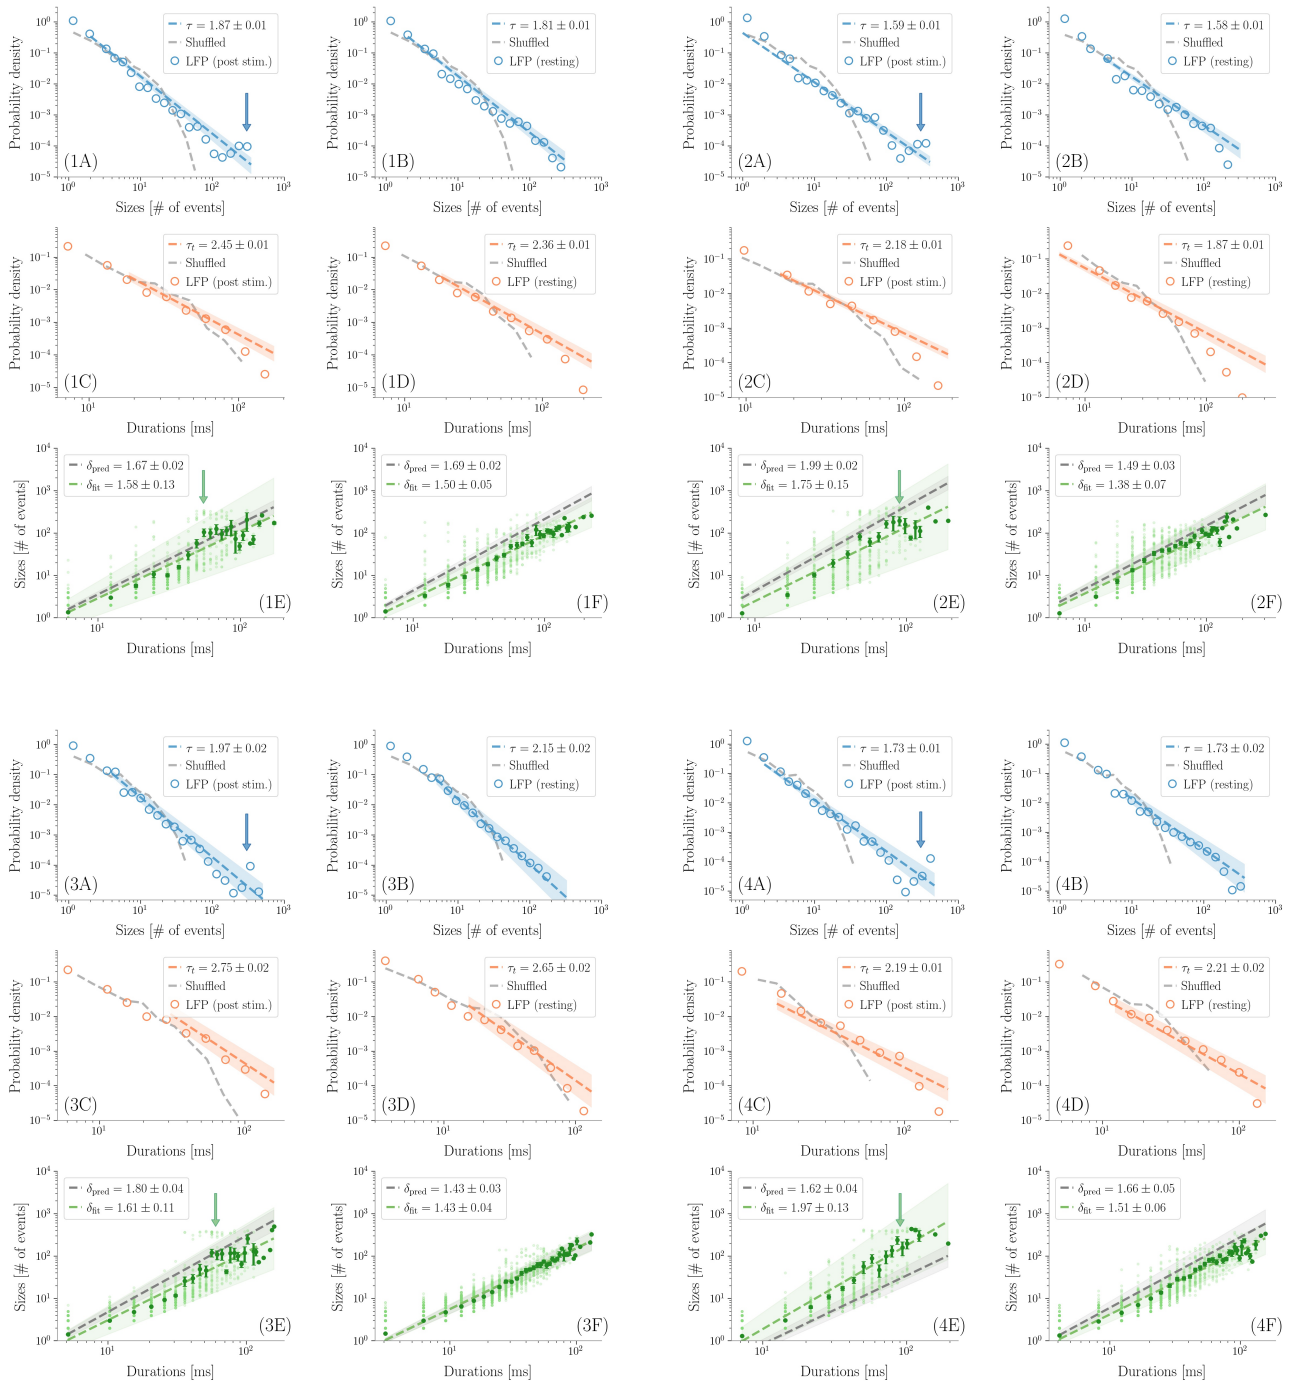

**Figure S4.** Distribution of avalanche sizes (in blue), durations (in red) and crackling noise relation (in green) in LFPs data obtained as described in the main text, both at resting and post stimulus for four different rats. Detailed avalanche statistics results are presented for all rats in the main text.

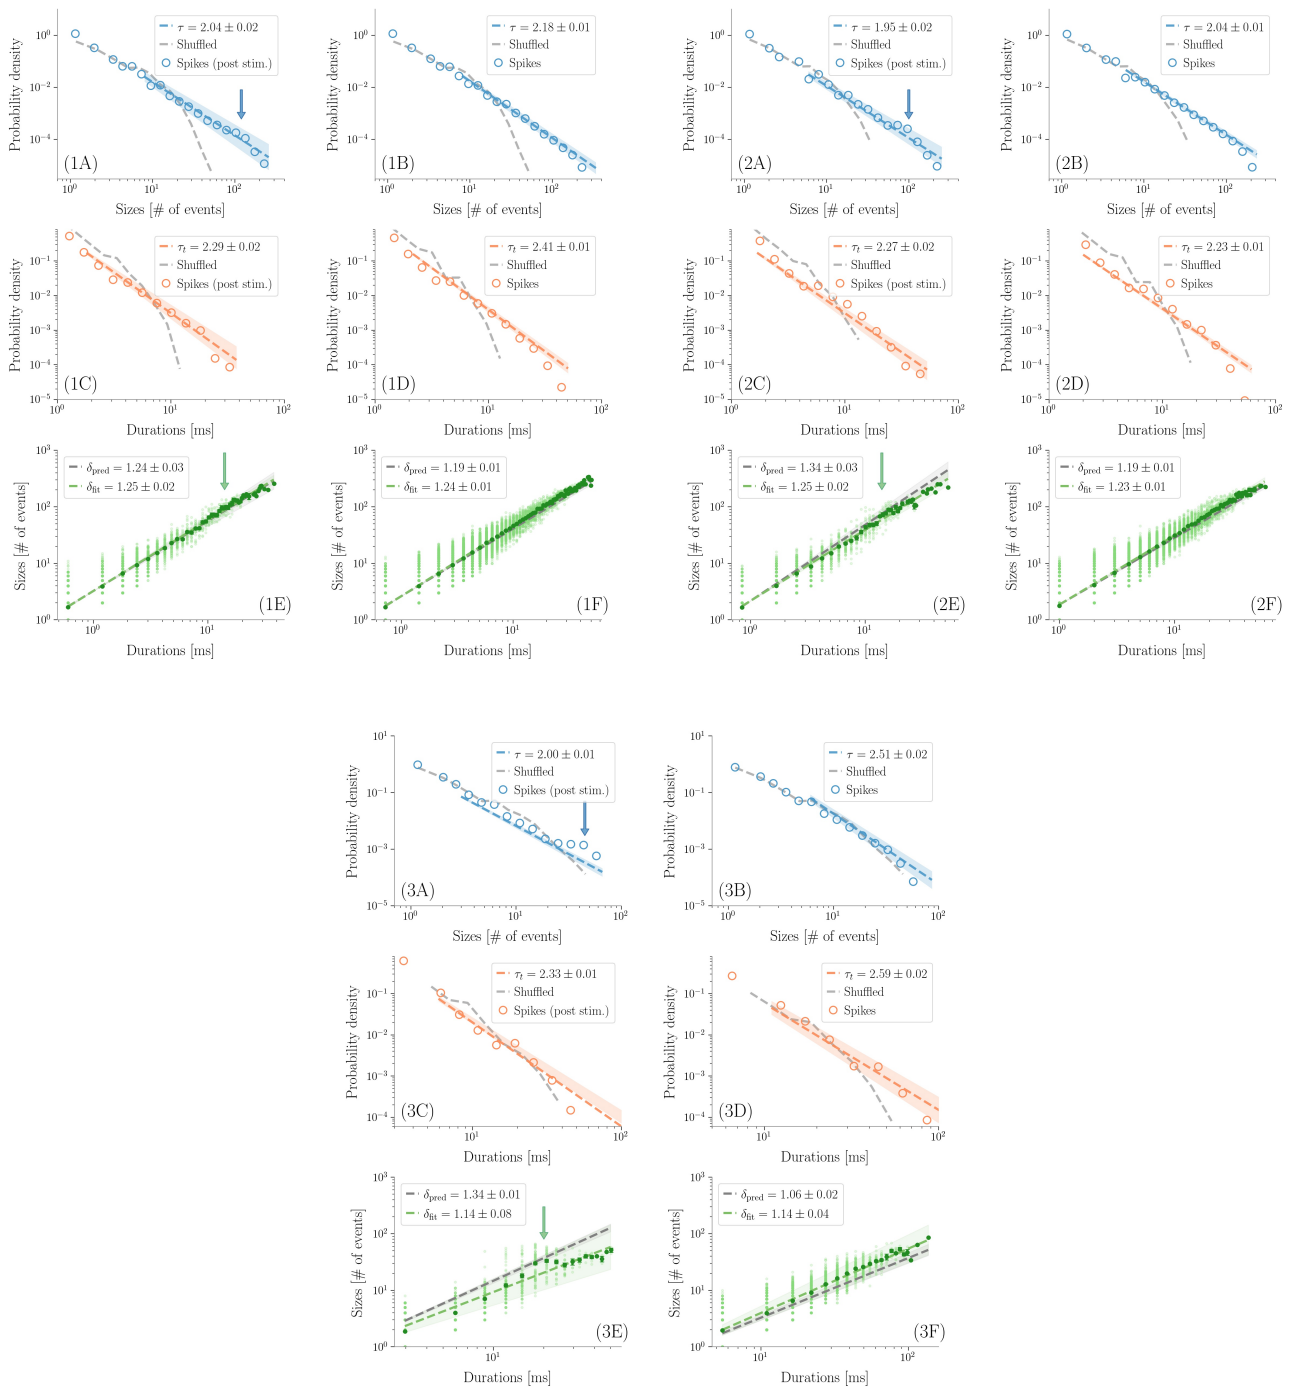

**Figure S5.** Distribution of avalanche sizes (in blue), durations (in red) and crackling noise relation (in green) in spikes data obtained as described in the main text, both at resting and post stimulus for three different rats. Detailed avalanche statistics results are presented for all rats in the main text.
